# Supplementary material for: SINEUP non-coding RNAs rescue defective frataxin expression and activity in a cellular model of Friedreich's Ataxia
Source: PubMed Central journal article supplement (PMC6847766; doi:10.1093/nar/gkz798), 2019-10-04
Supplement: gkz798_supplemental_file.pdf [file gkz798_supplemental_file.pdf]

Supplementary Table 1

| Cloning Oligo:     | Sequence (5' → 3'):                                                         | Features:                   |
|--------------------|-----------------------------------------------------------------------------|-----------------------------|
| -40/+4 fwd         | TCGAGGCTGCTCCGGGTCTGCCGCCGCTCCGCCCTCCAGCGCTG                                | BD of SINEUP and miniSINEUP |
| -40/+4 rev         | CAGCGCTGGAGGGCGGAGCGGGCGGCAGACCCGGAGCAGCC                                   | BD of SINEUP and miniSINEUP |
| -40/+0 fwd         | TCGAGGCTGCTCCGGGTCTGCCGCCGCTCCGCCCTCCAGCGCTG                                | BD of SINEUP and miniSINEUP |
| -40/+0 rev         | CAGCGCTGGAGGGCGGAGCGGGCGGCAGACCCGGAGCAGCC                                   | BD of SINEUP and miniSINEUP |
| -14/+0 fwd         | TCGAGGCTGCTCCGGGTCT                                                         | BD of SINEUP and miniSINEUP |
| -14/+0 rev         | AGACCCGGAGCAGCC                                                             | BD of SINEUP and miniSINEUP |
| -14/+4 fwd         | TCGAGACATGCTGCTCCGGGTCT                                                     | BD of SINEUP and miniSINEUP |
| -14/+4 rev         | AGACCCGGAGCAGCATGTC                                                         | BD of SINEUP and miniSINEUP |
| -40/+4 fwd         | TCGAGTCATCAAATAGACACTCTGCTTTTTGACATCCAAATCTGGTTG                            | BD of SINEUP and miniSINEUP |
| -40/+4 rev         | CAACCAGATTTGGAATGTCAAAAAGCAGAGTGTCTATTTGATGAC                               | BD of SINEUP and miniSINEUP |
| -40/+0 fwd         | TCGAGCAAATAGACACTCTGCTTTTTGACATCCAAATCTGGTTG                                | BD of SINEUP and miniSINEUP |
| -40/+0 rev         | CAACCAGATTTGGAATGTCAAAAAGCAGAGTGTCTATTTGC                                   | BD of SINEUP and miniSINEUP |
| -10/-60/+0 fwd     | TCGAGCAAATAGACACTCTGCTTTTTGACATCCAAATCTGGTTGAGGCCACGTTGGTTTCGAACTTGCGCGGCCG | BD of SINEUP and miniSINEUP |
| -10/-60/+0 rev     | CCGCCGCGCAAGTTTCAACCAACGTGGCCTCAACCAGATTTGGAATGTCAAAAAGCAGAGTGTCTATTTGC     | BD of SINEUP and miniSINEUP |
| Syber Green Oligo: | Sequence (5' → 3'):                                                         | Features:                   |
| hGAPDH fwd         | TCTCTGCTCCTCCTGTTT                                                          | Housekeeping gene           |
| hGAPDH rev         | GCCCAATACGACCAATCC                                                          | Housekeeping gene           |
| mAS3' Uchl1 fwd    | CTGGTGTGATTATCTCTTATGC                                                      | ED (SINEUP)                 |
| mAS3' Uchl1 rev    | CTCCCGAGTCTCTGTAGC                                                          | ED (SINEUP)                 |
| pTSinvB2 fwd       | CAGTGCTAGAGGAGGTGAGAAGA                                                     | ED (miniSINEUP)             |
| pTSinvB2 rev       | GGAGCTAAAGAGATGGCTCAGCACTT                                                  | ED (miniSINEUP)             |
| hFXN fwd1          | GTGATCAACAAGCAGACGCCAAACAAGCA                                               | FRDA Fibroblast             |
| hFXN rev1          | GTACACCCAGTTTTTCCAGTCCAGTCA                                                 | FRDA Fibroblast             |
| hFXN fwd2          | CCTTGACAGACAAGCCATACACGTTTGAG                                               | FRDA Fibroblast             |
| hFXN rev2          | CTGCTTGTGATCACATAGGTTCCTAGATC                                               | FRDA Fibroblast             |
| hFXN fwd           | GGAACGCTGGACTCTTAGC                                                         | Human Cell lines            |
| hFXN rev           | CCAGTTTGACAGTTAAGACACCA                                                     | Human Cell lines            |
| hStx1b fwd         | TTGGGAGACATCAGAGCAGG                                                        | off-target                  |
| hStx1b rev         | GACGCATAGAAAGGGCACAG                                                        | off-target                  |
| hFam49a fwd        | CGTCCAAGACTTACGGGTGG                                                        | off-target                  |
| hFam49a rev        | CCTTGGGTCTGTAATGGCCT                                                        | off-target                  |
| hTubgcp5 fwd       | GCTCAGTTCGGACCACAAAA                                                        | off-target                  |
| hTubgcp5 rev       | TGTAGTTGTCAAGCTGTCA                                                         | off-target                  |
| TaqMan Oligo:      | Sequence (5' → 3'):                                                         | Features:                   |
| FXN                | Hs00175940_m1                                                               | Target                      |
| hGAPDH             | Hs99999905_m1                                                               | Housekeeping gene           |
| GUSB               | Hs00939627_m1                                                               | Housekeeping gene           |
| ACTB               | Hs99999903_m1                                                               | Housekeeping gene           |
| miniSINEUP ED fwd  | GGTCAGAAGAGGGCATTGGA,                                                       | ED (miniSINEUP)             |
| miniSINEUP ED rev  | CCACCACGAGGTTACCGTATAAC                                                     | ED (miniSINEUP)             |
| Probe              | CCCCAGAACTGG                                                                | ED Probe                    |

# Supplementary Figure 1

A

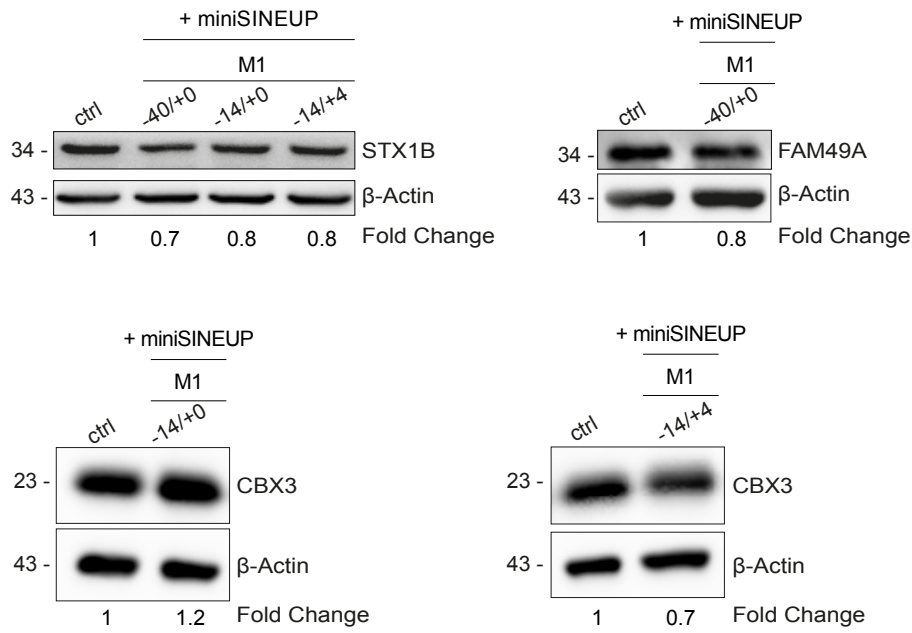

B

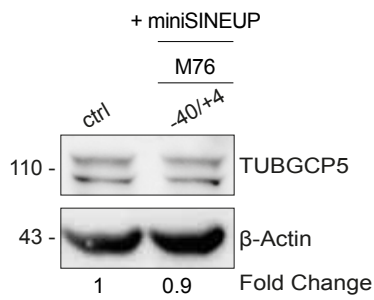

C

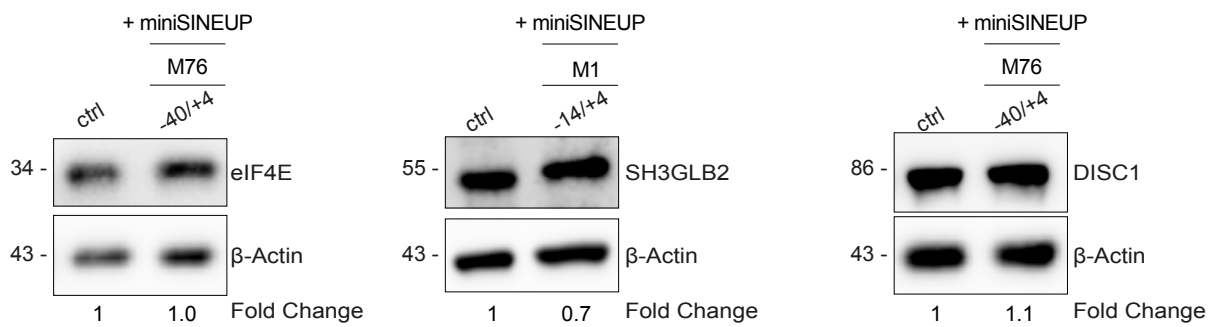

## Supplementary Figure 2

A

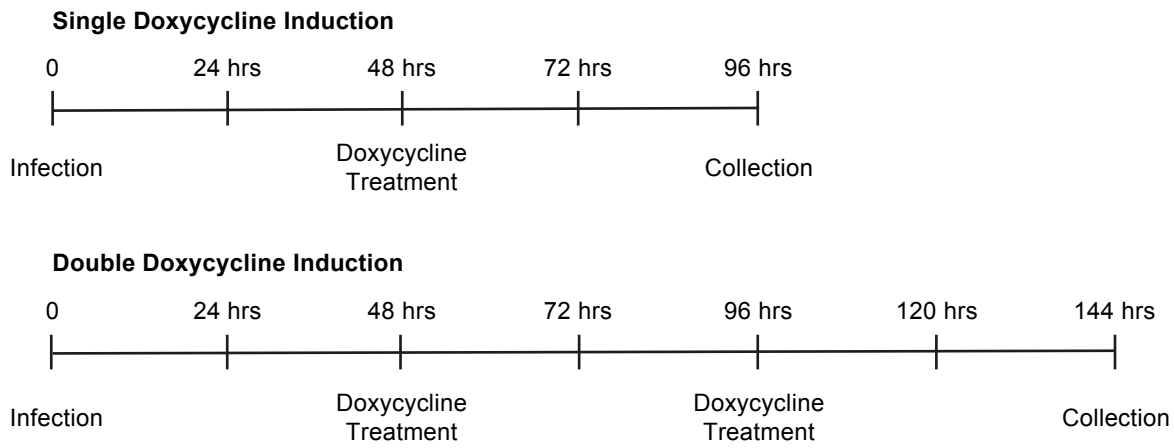

B

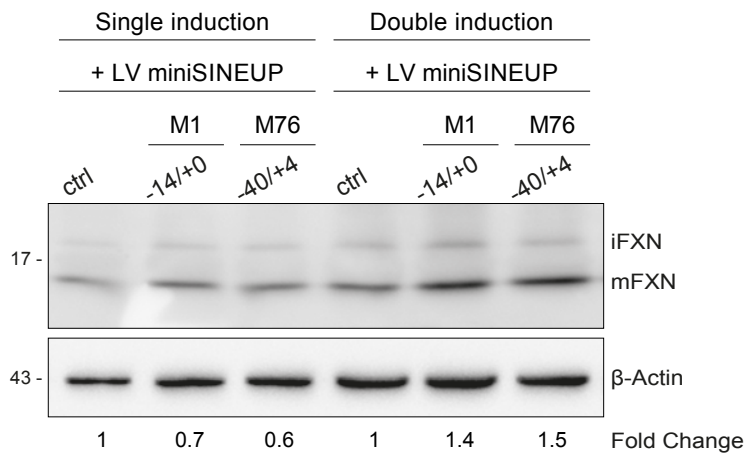

C

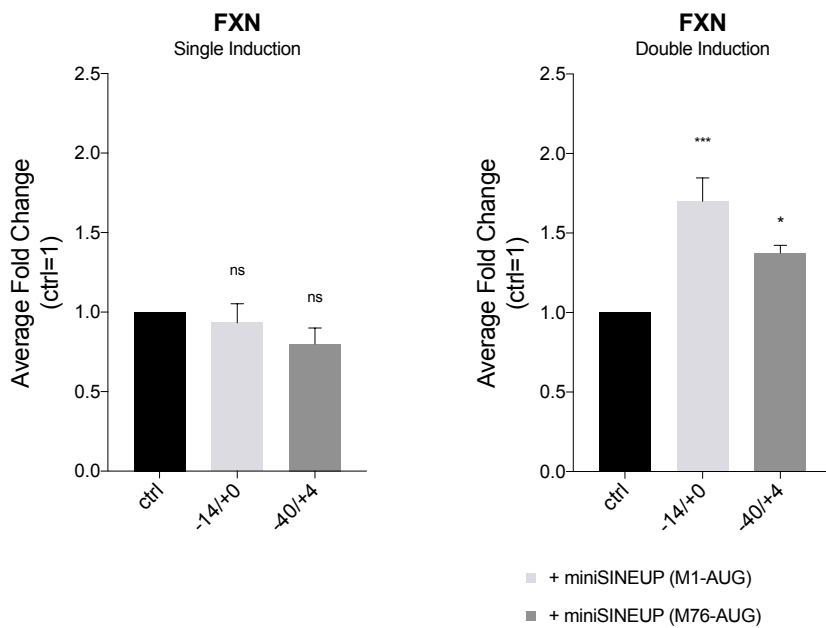

## Supplementary material

**Supplementary Table 1. List of primers.** Complete list of oligonucleotides used in this study for cloning and quantitative PCR experiments.

**Supplementary Figure 1. Off-targets western blot analysis.** (A-C) HEK 293T/17 cells were transfected with empty vector (ctrl) and miniSINEUP-FXN variants (-40/+0; -14/+0 and -14/+4 M1-AUG or -40/+4 M76-AUG) and harvested 48 hours post transfection. Empty vector (ctrl) was taken as negative control. Whole cell lysates derived from experiments presented in **Figure 3** were analysed by western blotting with anti-STX1B, anti-FAM49A, anti-CBX3 in (A), anti-TUBGCP5 in (B), anti-EIF4E, anti-SH3GLB2, anti-DISC1 in (C) and anti- $\beta$ -actin antibodies. Off-targets western blot are grouped on the basis of alignment localization: 5'-UTR in (A), CDS in (B) and 3'-UTR in (C). One representative experiment for each off-target is shown. First, band intensity was normalized to the relative  $\beta$ -actin band. Then, fold change values were calculated normalizing to control cells (ctrl). Average fold changes are shown in **Figure 5B**. Unchanged off-targets protein levels are shown.

**Supplementary Figure 2. miniSINEUPs lentiviral transduction optimization.** (A-C) Infection of human neuroblastoma cells (SH-SY5Y) with inducible lentiviral vectors driving the expression of LVminiSINEUP-FXN variants (-14/+0 M1-AUG or -40/+4 M76-AUG) and empty viruses (ctrl) (A) Doxycycline treatment timelines. Single induction (top): 48 hrs after infection (time 0), cells were subjected to doxycycline treatment and harvested 96 hrs after infection. Double induction (bottom): cells were treated twice with doxycycline (time 48 and 96 hrs) and harvested 144 hrs after infection. (B) SH-SY5Y cells were infected following both protocols timing. Whole cell lysates were analysed by western blotting with anti-FXN and anti- $\beta$ -actin antibodies. One representative experiment is shown. First, FXN band intensity was normalized to the relative  $\beta$ -actin. Then, fold change values were calculated normalizing to control cells (ctrl). LVminiSINEUP-FXN-infected cells show increased levels of endogenous FXN protein only with double doxycycline induction, while no up-regulation was observed after a single treatment. (C) Average fold change of FXN protein levels. Columns represent mean  $\pm$  S.E.M. of  $n \geq 3$  independent experiments; ns,  $p > 0.05$ ; \* $p < 0.05$ ; \*\* $p < 0.01$ ; \*\*\* $p < 0.001$ ; \*\*\*\* $p < 0.0001$  (one-way ANOVA followed by Dunnett's post-test).
